# Supplementary material for: Two-Color Pixel Patterning for High-Resolution Organic Light-Emitting Displays Using Photolithography
Source: MDPI journal article supplement (doi:10.3390/mi11070650), 2020-06-30
Supplement: s1 [file s1]

# Supplementary Materials: Two-Color Pixel Patterning for High Resolution Organic Light-Emitting Displays Using Photolithography

Yu Min Choi <sup>1</sup>, Han Young Shin <sup>1</sup>, Jongchan Son <sup>2</sup>, Chunhee Park <sup>2</sup>, Keun-Woo Park <sup>2</sup>, Jin-Kyun Lee <sup>2,\*</sup> and Byung Jun Jung <sup>1,\*</sup>

<sup>1</sup> Department of Materials Science and Engineering, University of Seoul, Seoul 02504, Republic of Korea; ccwe1001@naver.com (Y.M.C.); tlgksdud24@naver.com (H.Y.S.)

<sup>2</sup> Department of Polymer Science and Engineering, Inha University, Incheon 22212, Republic of Korea; thshwdcks1@naver.com (J.S.); nhd8991@naver.com (C.P.); rmsdn0112@naver.com (K.-W.P.)

\* Correspondence: jkl36@inha.ac.kr (J.-K.L.); jungbj@uos.ac.kr (B.J.J.); Tel.: +82-32-860-7481 (J.-K.L.); +82-2-6490-2412 (B.J.J.)

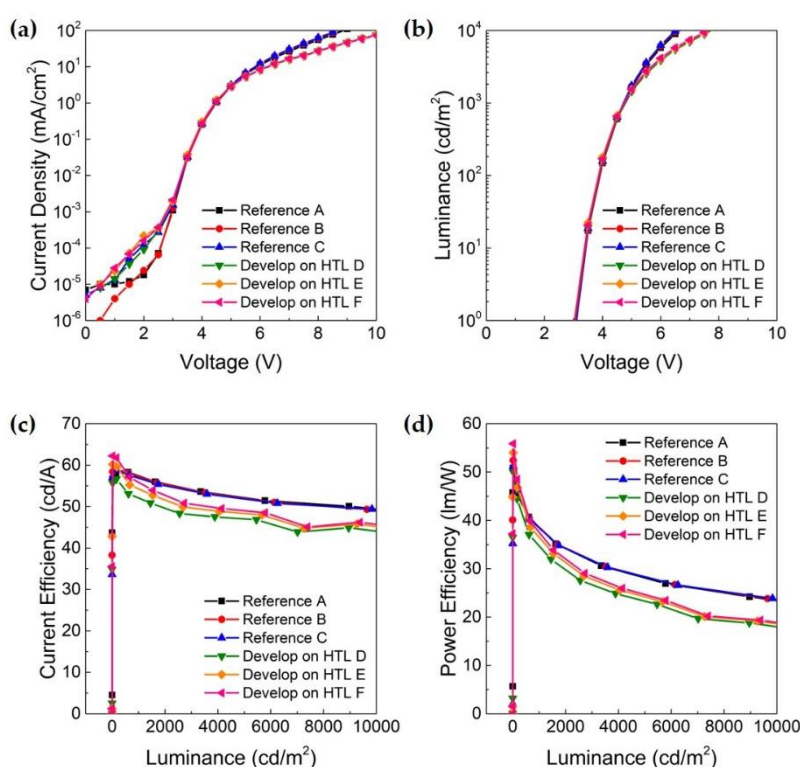

**Figure S1.** Additional comparison of the current-voltage-luminance (JVL) characteristics of the OLED patterned on the HTL devices and the reference devices: (a) current density-voltage; (b) luminance-voltage; (c) current efficiency-luminance; (d) power efficiency-luminance.

**Table S1.** Additional performance summary of reference devices and develop processed devices.

| Device           | Current efficiency <sup>1</sup><br>(cd/A) | Power efficiency <sup>1</sup><br>(lm/W) | External quantum efficiency <sup>1</sup><br>(%) | Driving voltage <sup>1</sup><br>(V) | Turn on voltage <sup>2</sup><br>(V) |
|------------------|-------------------------------------------|-----------------------------------------|-------------------------------------------------|-------------------------------------|-------------------------------------|
| Reference A      | 57.4                                      | 38.6                                    | 16.5                                            | 4.7                                 | 3.0                                 |
| Reference B      | 57.3                                      | 39.0                                    | 16.4                                            | 4.7                                 | 3.0                                 |
| Reference C      | 57.0                                      | 38.5                                    | 16.3                                            | 4.7                                 | 3.0                                 |
| Develop on HTL D | 52.1                                      | 34.7                                    | 15.0                                            | 4.7                                 | 3.0                                 |
| Develop on HTL E | 54.3                                      | 36.5                                    | 15.6                                            | 4.7                                 | 3.0                                 |
| Develop on HTL F | 55.9                                      | 37.6                                    | 16.0                                            | 4.7                                 | 3.0                                 |

<sup>1</sup> at 1000 nit, <sup>2</sup> at 1 nit.

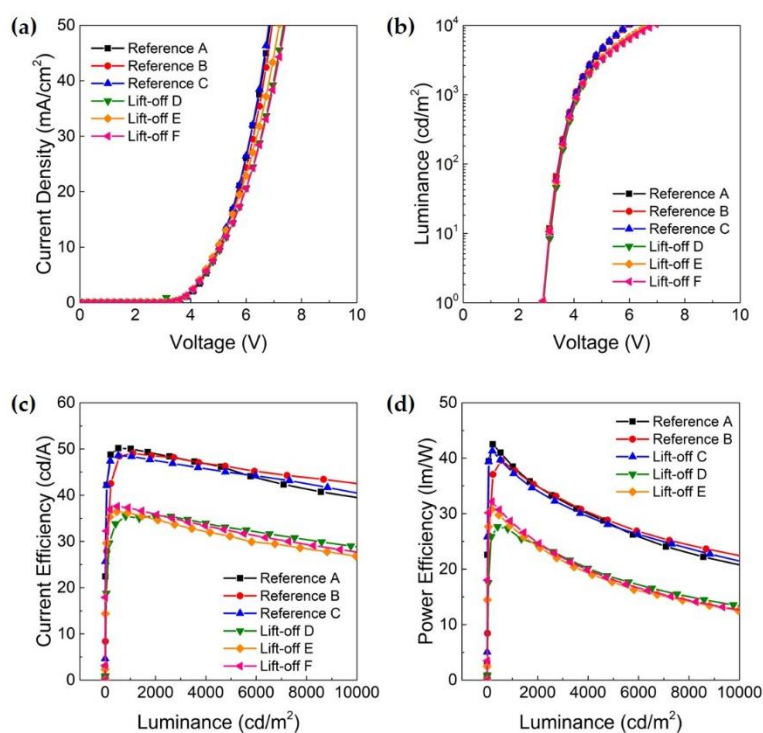

**Figure S2.** Additional comparison of the current-voltage-luminance (JVL) characteristics of the OLED subjected to the lift-off process devices and the non-processed reference devices: (a) current density-voltage; (b) luminance-voltage; (c) current efficiency-luminance; (d) power efficiency-luminance.

**Table S2.** Additional performance summary of reference devices and lift-off devices (slight different conditions for exposure time and stripper concentration).

| <b>Device<br/>(exposure time at 20 mW/cm<sup>2</sup>,<br/>stripper concentration)</b> | <b>Current<br/>efficiency <sup>1</sup><br/>(cd/A)</b> | <b>Power<br/>efficiency <sup>1</sup><br/>(lm/W)</b> | <b>External quantum<br/>efficiency <sup>1</sup><br/>(%)</b> | <b>Driving<br/>voltage <sup>1</sup><br/>(V)</b> | <b>Turn on<br/>voltage <sup>2</sup><br/>(V)</b> |
|---------------------------------------------------------------------------------------|-------------------------------------------------------|-----------------------------------------------------|-------------------------------------------------------------|-------------------------------------------------|-------------------------------------------------|
| Reference A                                                                           | 50.0                                                  | 38.6                                                | 14.5                                                        | 4.0                                             | 2.8                                             |
| Reference B                                                                           | 49.0                                                  | 38.6                                                | 14.6                                                        | 4.1                                             | 2.9                                             |
| Reference C                                                                           | 48.4                                                  | 37.5                                                | 14.1                                                        | 4.1                                             | 2.9                                             |
| Lift-off D<br>(30s exposure, 3.0%(v/v))                                               | 35.3                                                  | 26.7                                                | 10.3                                                        | 4.2                                             | 2.9                                             |
| Lift-off E<br>(30s exposure, 2.5%(v/v))                                               | 36.1                                                  | 27.5                                                | 10.5                                                        | 4.1                                             | 2.8                                             |
| Lift-off F<br>(50s exposure, 3.0%(v/v))                                               | 37.2                                                  | 28.4                                                | 11.0                                                        | 4.1                                             | 2.9                                             |

<sup>1</sup> at 1000 nit, <sup>2</sup> at 1 nit.
